# Supplementary material
Source: publisher figshare collection journal article supplement (https://gsapubs.figshare.com/ndownloader/files/22745423)
Supplement: Supplementary file 1 [file 22745423]

## APPENDIX A: Data and analytical techniques

Zircon concentrates were obtained by standard separation techniques: crushing, sieving, heavy liquids, and magnetic separation. Selected zircon crystals were hand-picked from concentrates using high power (160x) stereo-zoom microscopes with cross-polarization for inclusion screening; however, most of the investigated zircons did contain small (~5-20  $\mu\text{m}$ ) visible inclusions.

### U/Pb dating

A Lambda Physik LPX 120I ArF excimer laser with a 193 nm wavelength and 29 micron beam diameter operating at 5 Hz was used to ablate holes in unpolished zircons from the Navajo Sandstone, standard zircons, and NIST 610 glass exposed on sticky tape in a sample cell connected to an Agilent 7500S ICP-MS. The method is generally that reported in Eggins and Shelley (2002). The cell was under a positive gas pressure of Ar and He with their gas port geometries arranged so that a stratified flow of He carried the sample away from the ablation site and the mixed gas carried the ablated sample through a smoothing manifold and into the ICP-MS. Note that analysis of unknowns on a rough surface produces a noisier signal than those analyzed on a flat one. Masses of isotopes used in geochronology ( $^{206}\text{Pb}$ ,  $^{207}\text{Pb}$ ,  $^{208}\text{Pb}$ ,  $^{232}\text{Th}$ ,  $^{235}\text{U}$ , and  $^{238}\text{U}$ ) were each analysed for 0.04 s, and other elements of geochemical interest ( $^{29}\text{Si}$ ,  $^{31}\text{P}$ ,  $^{91}\text{Zr}$ ,  $^{177}\text{Hf}$ , and 7 REE<sup>s</sup>) were each collected for 0.01 s. Data were collected in peak jumping mode with a mass sweep time of 0.384 seconds. As an indicator of sensitivity, background-corrected  $^{208}\text{Pb}$  produced ~1650 cps/ppm on NIST 610. Background levels (in “laser off” mode) were collected for about 20 s at the beginning of each analysis, then a “laser on” signal was collected for 20 s with a material drilling rate of about 1  $\mu\text{m}/\text{s}$ . The analysis menu consisted of R33 (zircon standard), NIST610, and then 5 unknowns resulting in 9 analyses on each of the standards and 40 analyses of unknowns. Two standards are necessary because 1) precision for geochronology requires down-hole fractionation effects on isotope ratios to be modelled from zircon and 2) an homogenous glass is required for calculating concentrations, especially Th/U, as standard zircons have uniform ages but are chemically inhomogenous. Background-corrected isotope ratios for concentration calculations were formed for each mass sweep for each analysis after a stable signal was achieved (about 5 s after laser-on), for Th/U and all other elements ratioed to  $^{29}\text{Si}$ . Concentrations were derived using NIST610 as a standard, and assuming a stoichiometric concentration of  $\text{SiO}_2$  of 37.22 wt% in the zircon. Zircon  $^{232}\text{Th}/^{238}\text{U}$  is calculated assuming NIST 610 has  $^{232}\text{Th}/^{238}\text{U}$  of 1.0187. Similarly, background-corrected isotope ratios for geochronology were formed for each mass sweep for each analysis after a stable signal was achieved (about 5 s after laser-on). U/Pb and Th/Pb ratios are then normalized to the average standard zircon, R33, mass-sweep by mass-sweep. This standard is known to be concordant at 418.4 $\pm$ 1 Ma (L.P. Black et al., in review). The measured uncertainties in the standard ratios used for chronology are incorporated into the quoted age uncertainties of the unknowns along with counting uncertainties in the analysis itself. The uncertainty on average R33 was 3.84% for  $^{206}\text{Pb}/^{238}\text{U}$  and 2.57% for  $^{207}\text{Pb}/^{206}\text{Pb}$  (1  $\sigma$  std dev). Most of this uncertainty derives from time-dependent ICP and laser drift but some probably derives from analysis on a rough surface. Common Pb content of zircons cannot be directly measured as counts on  $^{204}\text{Pb}$  are low, and systemic Hg isobarically interferes. After these normalizations, common Pb is calculated and corrected for through the following steps. Using the initially calculated  $^{206}\text{Pb}/^{238}\text{U}$  age direct from its ratio, the corresponding  $^{208}\text{Pb}/^{232}\text{Th}$  on concordia is known and the  $^{232}\text{Th}/^{238}\text{U}$  for the

zircon has been measured. The difference between the measured  $^{208}\text{Pb}/^{232}\text{Th}$  and the one corresponding to the  $^{206}\text{Pb}/^{238}\text{U}$  age (surplus or deficit) is attributed to common  $^{208}\text{Pb}$ . Using the Cumming and Richards (1975) age-dependent Pb model, the number of atoms of  $^{206}\text{Pb}$  and  $^{207}\text{Pb}$  are calculated and subtracted from the corresponding U/Pb and  $^{207}\text{Pb}/^{206}\text{Pb}$  ratios. This process is repeated until the  $^{207}\text{Pb}/^{206}\text{Pb}$  ratio stops changing at a level corresponding to an age difference of 0.1 Ma. The resulting ratios allow the calculation of the “ $^{208}\text{Pb}$ -corrected  $^{206}\text{Pb}/^{238}\text{U}$  and  $^{207}\text{Pb}/^{206}\text{Pb}$  ages.” The former is quoted for grains with ages less than 1300 Ma, and the latter for those older. Grains are deemed concordant if these two ages agree within 2% taking uncertainties into account. In this data set of 40 grains, 9 are discordant.  $^{235}\text{U}$  is measured only for use when U signals are intense, and this circumstance was not encountered in this data set. Concordia plots for the zircons analyzed for this study are shown in Fig. DR1.

### **(U-Th)/He dating**

Following U/Pb analysis, concordant zircons were retrieved and rinsed in acetone to avoid He-contamination from tape. (U-Th)/He ages were performed by Nd-YAG laser heating for He extraction, and sector ICP-MS for U-Th determinations, at Yale University. Crystals were measured and digitally photographed in at least 2 different orientations for  $\zeta$ -ejection corrections. Crystals were placed in 1-mm Pt foil tubes, and loaded into stainless steel sample planchets with 32 sample slots. Planchets were loaded into a ~10 cm diameter laser cell with sapphire window, connected by high-vacuum flexhose to the He extraction/measurement line. Once in the laser cell and pumped down to a vacuum of  $<10^{-7}$ - $10^{-8}$  torr, the crystal-bearing foil tubes were individually heated by lasing with about 1-5 W on the Nd-YAG for 20 minutes. Temperatures of heated foil packets were not measured, but from experiments relating luminosity and step-wise degassing of both apatite and zircon, we estimate typical heating temperatures of 1250-1400 °C for zircon.  $^4\text{He}$  blanks (0.05-0.1 femtomol  $^4\text{He}$ , after correction for spike  $^4\text{He}$ ) were determined by heating empty foil packets using the same procedure. Crystals were checked for quantitative degassing of He by sequential reheating. Gas liberated from samples was processed by: 1) spiking with ~0.4 pmol of  $^3\text{He}$ , 2) cryogenic concentration at 16 K on a charcoal trap (condensation time calibrated for no significant  $^4\text{He}/^3\text{He}$  fractionation), and purification by release at 37 K, followed by 3) measurement of  $^4\text{He}/^3\text{He}$  ratios (corrected for HD and  $\text{H}_3$  by monitoring  $\text{H}^+$ ) on a quadrupole mass spectrometer next to a cold Zr-alloy getter. All ratios were referenced to multiple same-day measured ratios and known volumes of  $^4\text{He}$  standards processed in the same way. Linearity of this standard referencing procedure has been confirmed over four orders of magnitude of  $^4\text{He}$  intensity.  $^4\text{He}$  standard reproducibility averages 0.2% on a daily and long-term (tank-depletion corrected) basis. Estimated 2 $\sigma$  analytical uncertainty on sample He determinations, including precision and accuracy from original manometric  $^4\text{He}$  standard calibrations, is 1-2%.

Following degassing, samples were retrieved from the laser cell, spiked with a calibrated  $^{229}\text{Th}$  and  $^{233}\text{U}$  solution, dissolved in Teflon microvials in Parr bombs with HF and  $\text{HNO}_3$ , followed by either  $\text{H}_3\text{BO}_3$  or another bomb run with HCl to remove fluoride salts, and a final dissolution in  $\text{HNO}_3$ . Each sample batch was prepared with a series of acid blanks and spiked normal solutions to check the purity and calibration of the reagents and spikes. Spiked solutions were analyzed as 0.5 ml of ~1-5 ppb U-Th solutions by isotope dilution on a Finnigan Element2 ICP-MS with a Teflon micro-flow nebulizer and double-pass spray chamber. Procedural U and Th blanks by this method are  $1 \pm 0.5$  pg and  $2 \pm 1$  pg, respectively. Routine in-run precisions and long-

term reproducibilities of standard  $^{232}\text{Th}/^{229}\text{Th}$  and  $^{238}\text{U}/^{233}\text{U}$  ratios are 0.1-0.4%, and estimated uncertainty on sample U-Th contents are estimated to be 1-2% ( $2\omega$ ).

To ensure that the laser ablation process does not mobilize helium, combined He-Pb ages were measured on single-crystals of the quickly-cooled Fish Canyon Tuff (Fig. DR2). He ages obtained from these zircons are similar to U/Pb ages for each sample, as well as to He ages from other Fish Canyon Tuff zircons that were analyzed by conventional (U-Th)/He methods. Replicate analyses of Durango apatite and Fish Canyon Tuff zircon during the period of these analyses yielded mean ages of  $32.5 \pm 1.5$  Ma ( $2\omega$ ;  $n = 42$ ) and  $28.3 \pm 2.4$  Ma ( $2\omega$ ;  $n = 37$ ), respectively. On the basis of reproducibility of these and other intralab standards, we estimate an analytical uncertainty of 8% ( $2\omega$ ) for zircon in this study.

## APPENDIX B: $\zeta$ -ejection correction for abraded detrital grains

For a description of the  $\zeta$ -ejection problem for igneous and metamorphic zircons, see Farley et al. (1996). In brief, the ejection of alpha particles during the breakdown of U and Th will lead to a  $\sim 15$  to  $20$   $\mu\text{m}$  thick rim around the edge of the crystal that has an anomalously low concentration of He. During sedimentary transport of a detrital grain, this He-depleted rim, along with its  $\zeta$ -ejection bias, can be removed due to grain abrasion. However, following deposition of the grain in the sedimentary environment, a new alpha ejection bias will develop.

We consider the case where the zircon He clock is not “reset” following deposition. We assume that abrasion completely removes the He-depleted rim that developed during the first stage of the grain’s history. We also assume that this abrasion occurs instantaneously at the time of deposition of the grain (i.e., transport and abrasion occur over a small fraction of the grain’s history). The solution requires independent knowledge of the stratigraphic age of the sedimentary unit to constrain the timing of the abrasion event. In the case of the Navajo sandstone, we use a stratigraphic age of 190 Ma (Peterson and Pippingos, 1979). Our model assumes that parent nuclides are uniformly distributed except along the rim. A more sophisticated model is necessary for cases where zircons are complexly zoned with respect to U and Th concentrations.

Farley et al. (1996) demonstrated that the corrected He age can be determined simply by dividing the measured He age (which is the age determined using the observed U, Th, and He concentrations) by the “retentivity” ( $F_t$ ). Retentivity is a function of the surface area/volume ratio of the crystal and can be calculated from the morphology of the grain. We note that the  $\zeta$ -ejection correction should be applied to the He concentration rather than the measured He age. However, in practice, these two methods yield similar results except for very old (on the order of 1 Ga) He ages, where application of the  $F_t$  correction to the measured age will begin to significantly overestimate the actual age (on the order of 10%).

In the case of an abraded detrital grain, the  $\zeta$ -ejection correction only needs to be applied to the post-abrasion “measured age” (i.e., the stratigraphic age). We solve for what “measured age” would need to be corrected to yield the stratigraphic age. This fraction of the observed “measured age” does not need to be corrected for alpha ejection. Let  $A_c$  represent the corrected helium age,  $A_d$  represent the depositional age of the sedimentary host,  $A_{pd}$  represent the time in a grain’s history between closure of the helium system and its deposition (the “pre-depositional component of the age”), and  $A_m$  represent the measured age.

$$A_c = A_d + A_{pd}$$

We solve for  $A_m'$  (the part of the total measured age that needs to be corrected)

$$A_m' = A_d \times F_t$$

$$A_{pd} = A_m - A_m'$$

$$A_c = A_d + A_m - (F_t \times A_d)$$

$$A_c = A_d \times (1 - F_t) + A_m$$

Application of the standard correction procedure to abraded grains will over-correct the ages, resulting in overestimates of actual He ages potentially by 30% or more (Fig. DR3).

To test this model, we created a Monte-Carlo simulation of  $\zeta$ -ejection and grain abrasion. The model considers the crystal as a rectangular cylinder. Cartesian coordinates are randomly selected for one million parent atoms of  $^{238}\text{U}$ ,  $^{235}\text{U}$ , and  $^{232}\text{Th}$ . Radioactive decay is allowed to proceed for a specified period of time,  $t_1$ , representing the interval between initial closure of the He system and the time of exposure of the grain at the surface. If a given parent atom is selected to decay, the locations of 6 to 8 (depending on the type of parent) He nuclides are generated by randomly selecting a direction for displacement of the daughter and using the stopping distances reported by Farley et al. (1996).

The volume of the crystal is then reduced to simulate the effects of grain abrasion (see Fig. DR4, A-D). Abrasion first removes the corners of the grains, preserving the faces of the rectangular cylinder. The “abrasion index” corresponds to the radius of the circle used to trim the corners of the grain. After the corners are completely removed (the volume is now a regular cylinder) further abrasion is simulated by shrinking the radius of the cylinder. Decay then proceeds for a time,  $t_2$ , which represents the interval of time between deposition and the modern day. As before, final coordinates for the He nuclides are determined by randomly selecting a displacement direction and using the relevant stopping distances.

The number of parent and daughter nuclides within the final volume can be used to calculate the “measured age,” which suffers from an  $\zeta$ -ejection bias. Both the standard correction factor and the abrasion model can be applied and compared with the imposed age. In cases where no abrasion of the grain has occurred, the standard correction factor accurately corrects the age, whereas the abrasion correction factor underestimates the actual age. In cases where abrasion of the crystal removes part, but not all, of the original He-depleted rim, the actual age will be bracketed by ages predicted by the two different correction factors. In cases where abrasion has sufficiently removed the He-depleted rim, the abrasion correction factor accurately corrects the measured age, whereas the standard correction factor overestimates the age. Results for one set of numerical experiments are shown in Fig. DR4. Other experiments with different model parameters yielded similar results.

Thus, the numerical model confirms that the method developed here accurately corrects (U-Th)/He ages for  $\zeta$ -ejection biases in cases where abrasion removes the He depleted rim. However, it is necessary to examine the morphology of the detrital grains to estimate how abrasion has altered the shape of the grain. In the case of the Navajo grains, eolian processes have clearly rounded and worn away the edges of the grains. However, in the case of fluvial

sediments, individual detrital grains may experience little abrasion. In those circumstances, the standard formula of Farley et al. (1996) should be applied. In situations where the original He-depleted rim has been partially removed, the two formulas will bracket the “true” He age.

Both the standard and detrital alpha ejection corrections assume that the parent atoms are homogeneously distributed throughout the sample. However, U-Th zonation is commonly observed in zircons, and may introduce significant errors into the  $\zeta$ -ejection correction (e.g., Tagami et al., 2003). To assess the styles and extents of zonation in the Navajo Sandstone zircons, we obtained back-scattered electron (BSE) and cathodoluminescence (CL) images for a suite of randomly selected grains (Fig. DR5). In general, regions of zircon with high BSE and low CL intensities have relatively high U contents, although the magnitude of U-concentration contrast does not simply scale with brightness contrast in BSE or CL. In these samples, we observed a wide variety of zonation styles and apparent extents, but in most cases the zonation was not concentric with respect to the external morphology of the grain. These observations indicate that  $\zeta$ -ejection biases due to U-zonation will generally be negligible.

## REFERENCES CITED

Black, L.P., Kamo, S.L., Allen, C.M., Davis, D.W., Aleinikoff, J.N., Valley, J.W., Mundil, R., Campbell, I.H., Korsch, R.J., Williams, I.S., and Foudoulis, C., Towards more reliable Pb/U micro-probe geochronology: SHRIMP, ID-TIMS, ELA-ICP-MS, and oxygen isotope documentation for a series of zircon standards: *Chemical Geology* (in review).

Cumming G.L. and Richards, J.R., 1975, Ore lead isotope ratios in a continuously changing earth: *Earth and Planetary Science Letters*, v. 28, p. 155-171.

Eggins, S.M. and Shelley, J.M.G., 2002, Compositional heterogeneity in NIST SRM 610-617 glasses: *Geostandards Newsletter*, v. 26, p. 269-286.

Farley, K.A., Wolf, R.A., and Silver, L.T., 1996, The effects of long alpha-stopping distances on (U-Th)/He ages: *Geochimica et Cosmochimica Acta*, v. 60, p. 4223-4229.

Peterson, F., and Pipiringos, G.N., 1979, Stratigraphic relations of the Navajo Sandstone to Middle Jurassic formations, southern Utah and northern Arizona: U.S. Geological Survey Professional Paper 1035-B, p. B1–B43.

Tagami, T., Farley, K.A., and Stockli, D.F., 2003, (U-Th)/He geochronology of single zircon grains of known Tertiary eruption age: *Earth and Planetary Science Letters*, v. 6531, p. 1-11.

## ACKNOWLEDGEMENTS

We thank Mike Breeding and Jeremy Hourigan for guidance in preparing the CL grain mount and Jim Eckert for his assistance in obtaining the CL images.

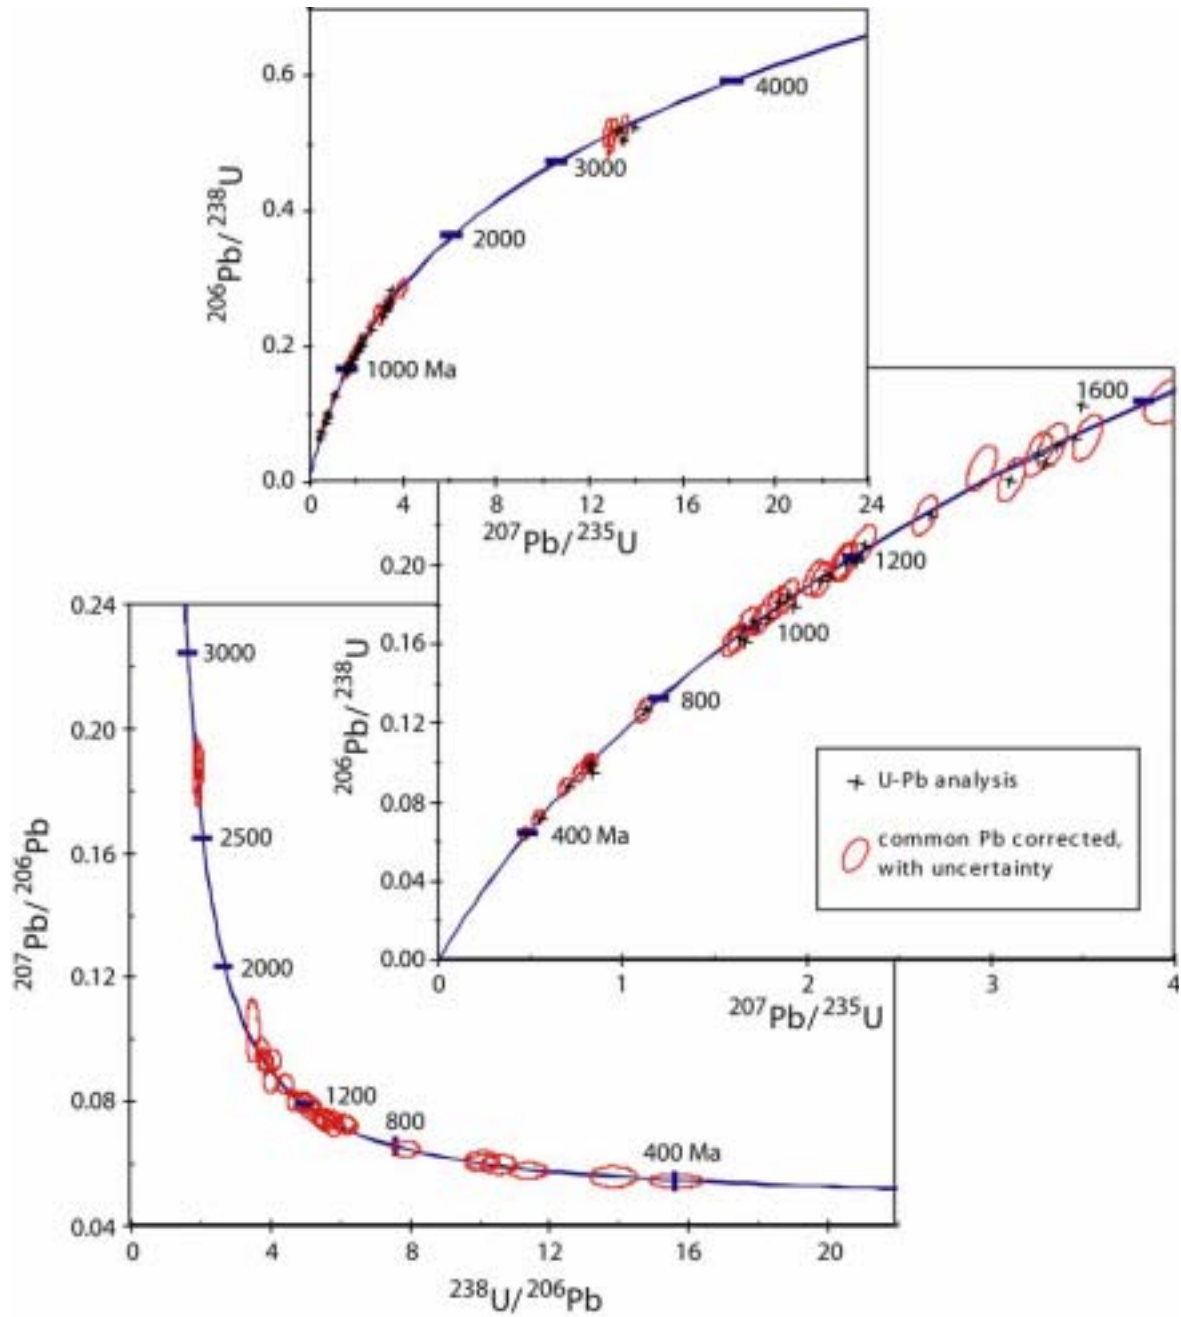

Figure DR1. U/Pb plots for Navajo grains in this study, with ellipses representing  $1\sigma$  uncertainty.

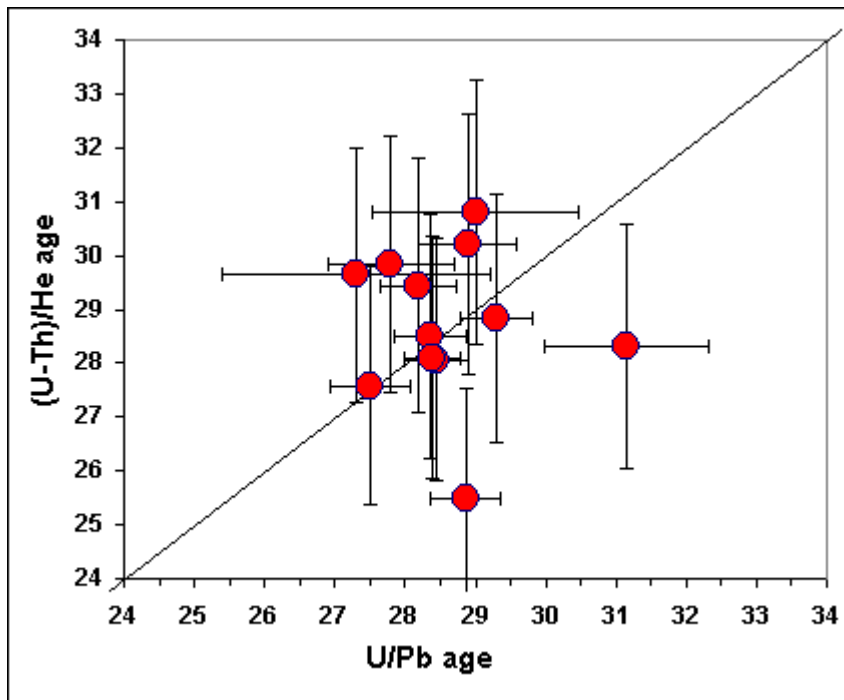

Figure DR2. Combined He-Pb plot for single zircons from the Fish Canyon Tuff. Bulk crystal (U-Th)/He ages are unaffected by the laser-ablation process.

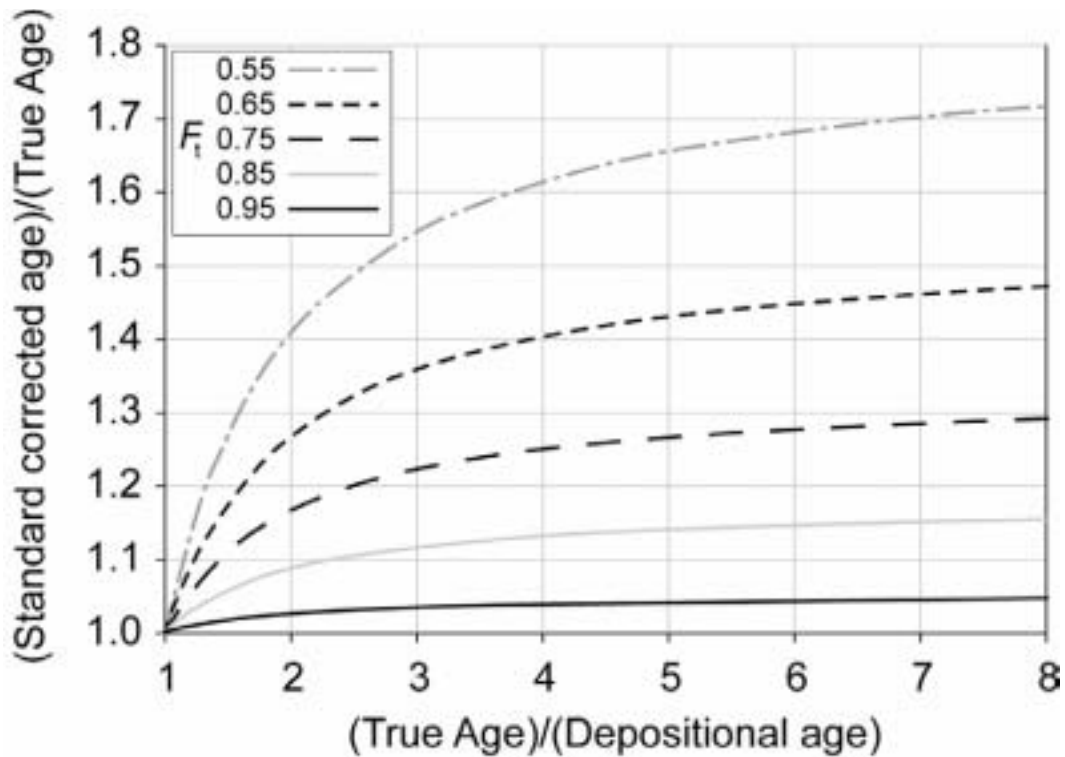

Figure DR3. Error caused by the use of the standard  $\zeta$ -ejection correction to grains for which the detrital  $\zeta$ -ejection correction formula described in this appendix is applicable. The  $y$ -axis shows the overestimate of the standard correction relative to the true age of the grain. The  $x$ -axis shows the true age of the sample, normalized against the depositional age. Thus, the greater the true age of the sample, the larger the absolute error. For example, for a grain with a  $F_t$  of 0.65 and a True Age equal to 4 times its Depositional Age, the standard correction factor will overestimate the True Age by 40%.



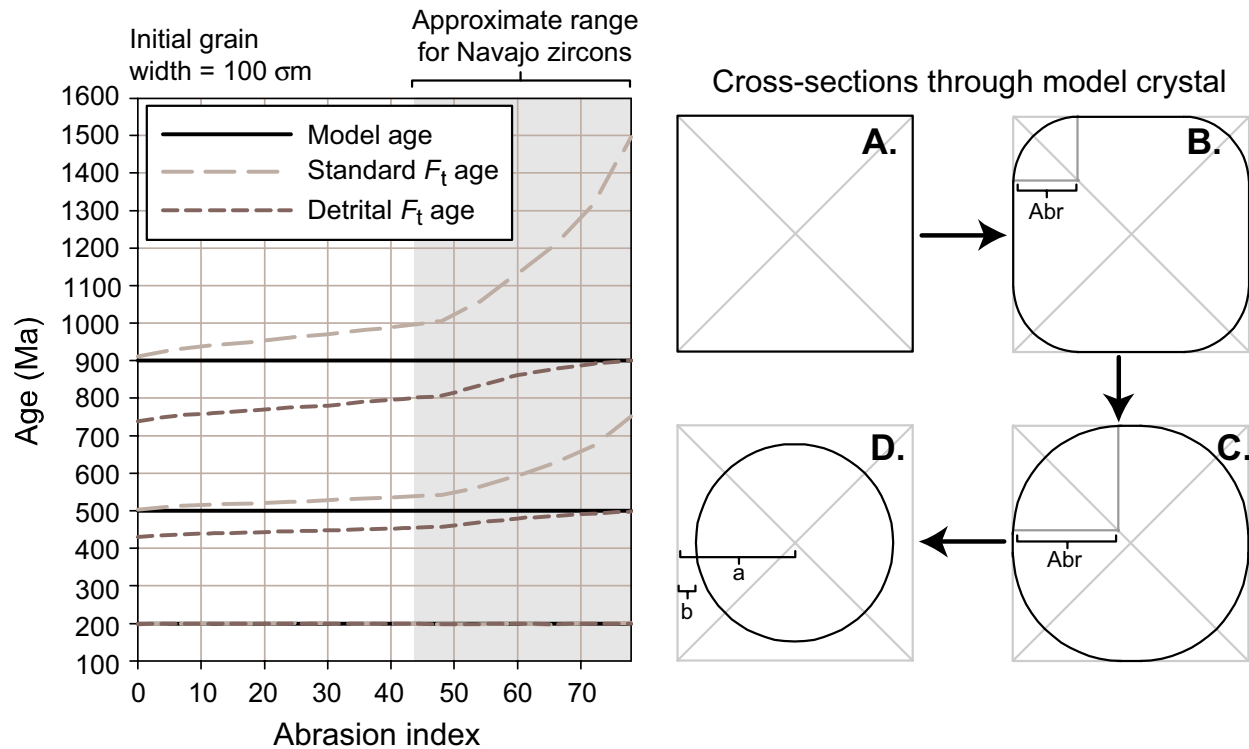

Figure DR4. Results from three Monte-Carlo simulations of  $\zeta$ -ejection. The initial grain width is set to  $100 \sigma_m$ , and the time of deposition,  $t_2$ , is set to 200 Ma. The time prior to deposition,  $t_1$ , was set to 0 myr, 300 myr, and 700 myr. For each model, the ages obtained by use of the standard and detrital  $\zeta$ -ejection corrections are shown as a function of the “abrasion index.” In the initial phases of rounding, the abrasion index corresponds to the radius of a circle used to trim the corner of the grain (“Abr” in B and C). When the corners are completely removed, further abrasion is simulated by reducing the radius of the cross-sectional circle (D). In D, the “abrasion index” is the sum of segments “a” and “b.” The range for the Navajo zircons, based on visual examination of grain morphology, is shown in grey. If no time elapses prior to deposition (e.g., volcanic grains, or cases where the He-clock is “reset” post-deposition due to heating above the closure temperature), then both  $\zeta$ -ejection corrections yield the same ages. However, when  $t_1$  is greater than zero, the simulations show that the age calculated using the standard approach will slightly overestimate the actual age of the grain and the detrital  $\zeta$ -ejection will yield an underestimate. If grain abrasion is significant (as in the case of the Navajo grains), the standard approach leads to a significant overestimate of the true age, while the detrital  $\zeta$ -ejection approach converges on the actual age.

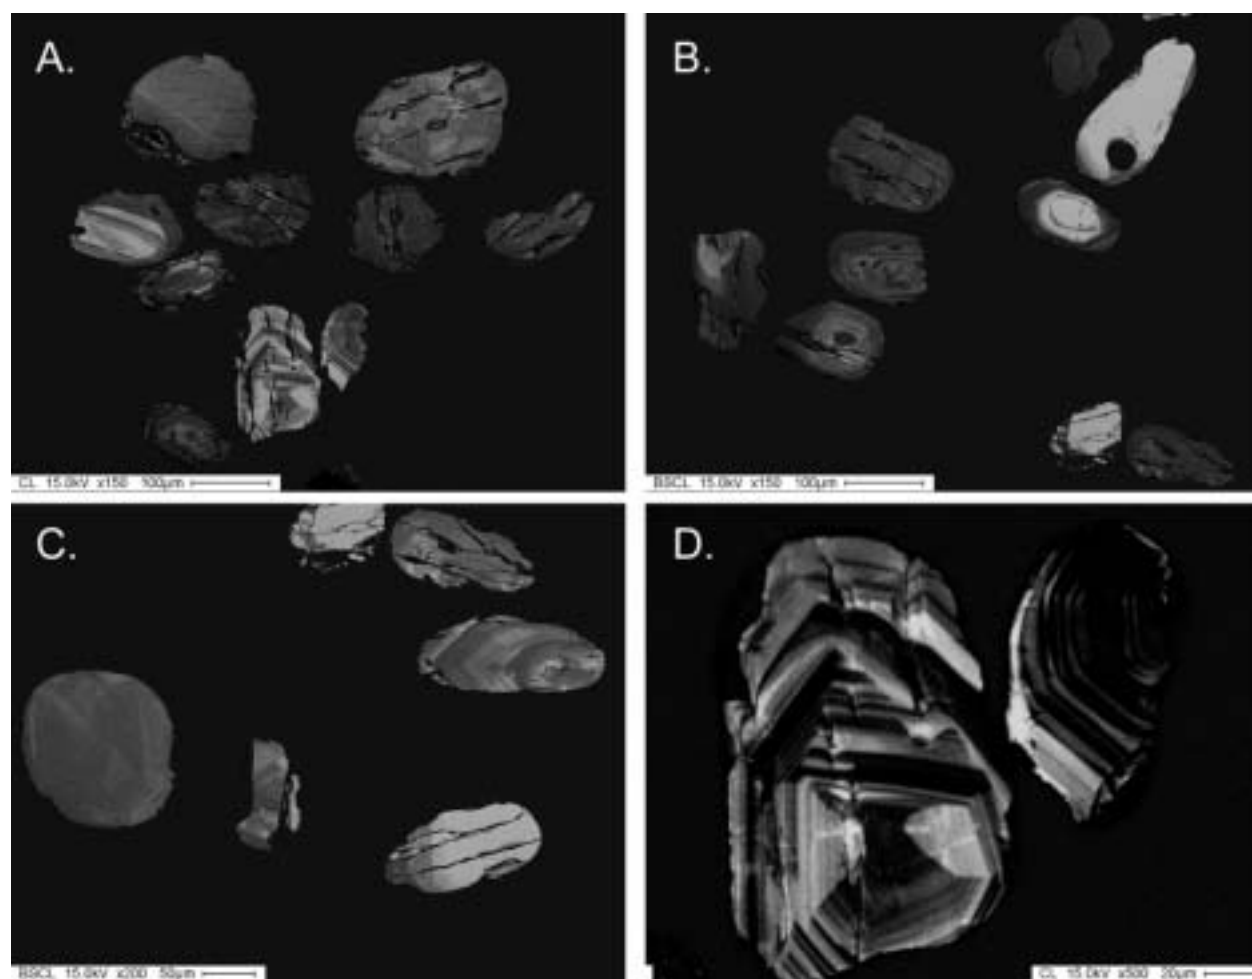

Figure DR5. A-C: Combined BSE and CL images of zircons from the Navajo Sandstone. D: CL only image of two highly zoned zircons.

| Sample  | Pb*(ppm) | Th/U  | U (ppm) | uncorr'd<br>206Pb/238U<br>ratio | $\pm 1\sigma$ | 208Pb<br>corr'd<br>206Pb*/238U<br>ratio | %common<br>206Pb<br>using<br>208Pb |
|---------|----------|-------|---------|---------------------------------|---------------|-----------------------------------------|------------------------------------|
| NAV1-01 | 61.6     | 1.350 | 91      | 0.50345                         | 0.00268       | 0.50130                                 | 0.42703                            |
| NAV1-02 | 11.3     | 0.351 | 123     | 0.09028                         | 0.00046       | 0.08996                                 | 0.35078                            |
| NAV1-03 | 25.3     | 0.109 | 419     | 0.06387                         | 0.00031       | 0.06379                                 | 0.13774                            |
| NAV1-04 | 109.3    | 0.351 | 190     | 0.51633                         | 0.00283       | 0.51483                                 | 0.29193                            |
| NAV1-05 | 92.5     | 0.704 | 150     | 0.51620                         | 0.00289       | 0.51533                                 | 0.16861                            |
| NAV1-06 | 110.7    | 0.345 | 562     | 0.19221                         | 0.00074       | 0.19223                                 | -0.00953                           |
| NAV1-07 | 16.2     | 0.474 | 76      | 0.20107                         | 0.00112       | 0.20085                                 | 0.11050                            |
| NAV1-08 | 33.6     | 0.536 | 138     | 0.22502                         | 0.00107       | 0.22477                                 | 0.10947                            |
| NAV1-09 | 33.3     | 1.995 | 48      | 0.46691                         | 0.00260       | 0.46320                                 | 0.80035                            |
| NAV1-10 | 94.0     | 0.354 | 498     | 0.18376                         | 0.00085       | 0.18379                                 | -0.01464                           |
| NAV1-11 | 72.7     | 0.183 | 457     | 0.16278                         | 0.00062       | 0.16272                                 | 0.03690                            |
| NAV1-12 | 12.5     | 0.979 | 103     | 0.10176                         | 0.00073       | 0.10147                                 | 0.28119                            |
| NAV1-13 | 20.8     | 0.805 | 101     | 0.18011                         | 0.00108       | 0.18012                                 | -0.00519                           |
| NAV1-14 | 25.6     | 0.475 | 193     | 0.12626                         | 0.00064       | 0.12619                                 | 0.05717                            |
| NAV1-15 | 11.4     | 0.813 | 58      | 0.17038                         | 0.00104       | 0.17011                                 | 0.16432                            |
| NAV1-16 | 16.1     | 0.547 | 172     | 0.08755                         | 0.00042       | 0.08736                                 | 0.21383                            |
| NAV1-17 | 103.9    | 0.578 | 359     | 0.26363                         | 0.00119       | 0.26418                                 | -0.20610                           |
| NAV1-18 | 96.1     | 0.358 | 1392    | 0.06559                         | 0.00263       | 0.05972                                 | 9.82583                            |
| NAV1-19 | 115.7    | 0.359 | 555     | 0.20187                         | 0.00373       | 0.20137                                 | 0.24946                            |
| NAV1-20 | 37.0     | 1.062 | 116     | 0.25992                         | 0.00120       | 0.25974                                 | 0.07270                            |
| NAV2-01 | 5.8      | 0.595 | 29      | 0.17878                         | 0.00160       | 0.17779                                 | 0.55984                            |
| NAV2-02 | 16.2     | 0.337 | 98      | 0.16141                         | 0.00104       | 0.16084                                 | 0.35404                            |
| NAV2-03 | 25.1     | 0.845 | 220     | 0.09880                         | 0.00061       | 0.09871                                 | 0.09063                            |
| NAV2-04 | 17.8     | 0.544 | 89      | 0.18582                         | 0.00104       | 0.18567                                 | 0.08312                            |
| NAV2-05 | 57.1     | 2.309 | 69      | 0.51944                         | 0.00175       | 0.51826                                 | 0.22811                            |
| NAV2-06 | 102.9    | 0.118 | 412     | 0.25568                         | 0.00098       | 0.25570                                 | -0.00739                           |
| NAV2-07 | 8.3      | 0.878 | 116     | 0.06122                         | 0.00049       | 0.06096                                 | 0.42407                            |
| NAV2-08 | 20.5     | 1.403 | 218     | 0.07197                         | 0.00044       | 0.07193                                 | 0.06568                            |
| NAV2-09 | 28.6     | 0.537 | 154     | 0.17269                         | 0.00086       | 0.17237                                 | 0.18960                            |
| NAV2-10 | 121.2    | 1.531 | 428     | 0.21008                         | 0.00094       | 0.21003                                 | 0.02468                            |
| NAV2-11 | 18.6     | 0.489 | 72      | 0.24241                         | 0.00128       | 0.24251                                 | -0.04070                           |
| NAV2-12 | 21.9     | 0.620 | 99      | 0.20138                         | 0.00112       | 0.20101                                 | 0.18367                            |
| NAV2-13 | 5.2      | 0.677 | 18      | 0.25115                         | 0.00253       | 0.24857                                 | 1.03765                            |
| NAV2-14 | 35.3     | 0.369 | 176     | 0.19367                         | 0.00087       | 0.19305                                 | 0.32103                            |
| NAV2-15 | 68.5     | 0.716 | 215     | 0.28144                         | 0.00137       | 0.28352                                 | -0.73359                           |
| NAV2-16 | 8.5      | 0.484 | 85      | 0.09496                         | 0.00071       | 0.09440                                 | 0.59080                            |
| NAV2-17 | 27.0     | 1.559 | 71      | 0.28019                         | 0.00172       | 0.28403                                 | -1.35388                           |
| NAV2-18 | 41.6     | 0.754 | 130     | 0.27949                         | 0.00207       | 0.27987                                 | -0.13507                           |
| NAV2-19 | 23.9     | 0.694 | 218     | 0.09878                         | 0.00061       | 0.09875                                 | 0.03007                            |
| NAV2-20 | 17.7     | 0.722 | 153     | 0.10342                         | 0.00065       | 0.10366                                 | -0.23666                           |

Table DR1. U/Pb data (1 of 3)

| <b>uncorr'd<br/>207Pb/235U</b> |                               | <b>208Pb<br/>corr'd<br/>207Pb*/235U</b> |              | <b>uncorr'd<br/>207Pb/206Pb</b> |                               | <b>208Pb corr'd<br/>207Pb*/206Pb*</b> |              | <b>uncorr'd<br/>208Pb/232Th</b> |                               |
|--------------------------------|-------------------------------|-----------------------------------------|--------------|---------------------------------|-------------------------------|---------------------------------------|--------------|---------------------------------|-------------------------------|
| <b>ratio</b>                   | <b>± 1<math>\sigma</math></b> | <b>ratio</b>                            | <b>ratio</b> | <b>ratio</b>                    | <b>± 1<math>\sigma</math></b> | <b>ratio</b>                          | <b>ratio</b> | <b>± 1<math>\sigma</math></b>   | <b>± 1<math>\sigma</math></b> |
| 13.29752                       | 0.12098                       | 12.97714                                | 0.19157      | 0.00141                         | 0.18775                       | 0.14137                               | 0.00089      |                                 |                               |
| 0.78651                        | 0.01902                       | 0.74745                                 | 0.06319      | 0.00149                         | 0.06026                       | 0.02966                               | 0.00045      |                                 |                               |
| 0.48705                        | 0.00634                       | 0.47637                                 | 0.05530      | 0.00067                         | 0.05416                       | 0.02161                               | 0.00039      |                                 |                               |
| 13.07496                       | 0.11592                       | 12.85126                                | 0.18366      | 0.00128                         | 0.18104                       | 0.15216                               | 0.00286      |                                 |                               |
| 13.19392                       | 0.10964                       | 13.06429                                | 0.18538      | 0.00114                         | 0.18387                       | 0.14465                               | 0.00124      |                                 |                               |
| 2.08111                        | 0.01497                       | 2.08348                                 | 0.07852      | 0.00048                         | 0.07861                       | 0.05748                               | 0.00034      |                                 |                               |
| 2.22539                        | 0.03666                       | 2.19659                                 | 0.08027      | 0.00124                         | 0.07932                       | 0.06111                               | 0.00083      |                                 |                               |
| 2.68136                        | 0.02514                       | 2.64902                                 | 0.08642      | 0.00070                         | 0.08547                       | 0.06774                               | 0.00058      |                                 |                               |
| 12.02789                       | 0.12391                       | 11.47674                                | 0.18683      | 0.00162                         | 0.17970                       | 0.13203                               | 0.00094      |                                 |                               |
| 1.89735                        | 0.01561                       | 1.90081                                 | 0.07488      | 0.00051                         | 0.07501                       | 0.05522                               | 0.00049      |                                 |                               |
| 1.64073                        | 0.01396                       | 1.63305                                 | 0.07310      | 0.00056                         | 0.07279                       | 0.04992                               | 0.00048      |                                 |                               |
| 0.91507                        | 0.01893                       | 0.87950                                 | 0.06522      | 0.00127                         | 0.06286                       | 0.03176                               | 0.00035      |                                 |                               |
| 1.84816                        | 0.03165                       | 1.84936                                 | 0.07442      | 0.00119                         | 0.07447                       | 0.05425                               | 0.00047      |                                 |                               |
| 1.13235                        | 0.01557                       | 1.12331                                 | 0.06504      | 0.00083                         | 0.06456                       | 0.03894                               | 0.00036      |                                 |                               |
| 1.72304                        | 0.03826                       | 1.68738                                 | 0.07334      | 0.00157                         | 0.07194                       | 0.05214                               | 0.00058      |                                 |                               |
| 0.71626                        | 0.01185                       | 0.69332                                 | 0.05934      | 0.00094                         | 0.05756                       | 0.02781                               | 0.00032      |                                 |                               |
| 3.45564                        | 0.02385                       | 3.52874                                 | 0.09507      | 0.00050                         | 0.09688                       | 0.07530                               | 0.00058      |                                 |                               |
| 1.10199                        | 0.07435                       | 0.40154                                 | 0.12186      | 0.00661                         | 0.04877                       | 0.04934                               | 0.00121      |                                 |                               |
| 2.28014                        | 0.04679                       | 2.21490                                 | 0.08192      | 0.00073                         | 0.07977                       | 0.06325                               | 0.00067      |                                 |                               |
| 3.36261                        | 0.04314                       | 3.33742                                 | 0.09383      | 0.00112                         | 0.09319                       | 0.07677                               | 0.00061      |                                 |                               |
| 1.93634                        | 0.04807                       | 1.80879                                 | 0.07855      | 0.00182                         | 0.07379                       | 0.05720                               | 0.00119      |                                 |                               |
| 1.67431                        | 0.03004                       | 1.60161                                 | 0.07523      | 0.00126                         | 0.07222                       | 0.05233                               | 0.00087      |                                 |                               |
| 0.82697                        | 0.01358                       | 0.81590                                 | 0.06070      | 0.00092                         | 0.05995                       | 0.03069                               | 0.00025      |                                 |                               |
| 2.07843                        | 0.02816                       | 2.05836                                 | 0.08112      | 0.00100                         | 0.08040                       | 0.05614                               | 0.00058      |                                 |                               |
| 13.73978                       | 0.09615                       | 13.56256                                | 0.19184      | 0.00118                         | 0.18980                       | 0.14333                               | 0.00099      |                                 |                               |
| 3.25841                        | 0.02231                       | 3.26093                                 | 0.09243      | 0.00053                         | 0.09249                       | 0.07566                               | 0.00108      |                                 |                               |
| 0.47113                        | 0.01200                       | 0.43989                                 | 0.05581      | 0.00135                         | 0.05233                       | 0.01973                               | 0.00024      |                                 |                               |
| 0.55689                        | 0.00866                       | 0.55112                                 | 0.05612      | 0.00080                         | 0.05557                       | 0.02246                               | 0.00019      |                                 |                               |
| 1.79912                        | 0.02514                       | 1.75723                                 | 0.07556      | 0.00099                         | 0.07394                       | 0.05328                               | 0.00055      |                                 |                               |
| 2.32038                        | 0.01711                       | 2.31365                                 | 0.08011      | 0.00047                         | 0.07989                       | 0.06287                               | 0.00044      |                                 |                               |
| 3.10261                        | 0.03735                       | 3.11577                                 | 0.09283      | 0.00100                         | 0.09318                       | 0.07092                               | 0.00079      |                                 |                               |
| 2.26313                        | 0.03044                       | 2.21517                                 | 0.08151      | 0.00100                         | 0.07993                       | 0.06141                               | 0.00073      |                                 |                               |
| 3.29477                        | 0.08074                       | 2.95529                                 | 0.09515      | 0.00213                         | 0.08623                       | 0.08174                               | 0.00131      |                                 |                               |
| 2.13026                        | 0.02340                       | 2.05026                                 | 0.07978      | 0.00080                         | 0.07703                       | 0.06190                               | 0.00098      |                                 |                               |
| 3.85075                        | 0.04112                       | 4.13421                                 | 0.09924      | 0.00094                         | 0.10576                       | 0.07581                               | 0.00077      |                                 |                               |
| 0.84375                        | 0.02177                       | 0.77486                                 | 0.06444      | 0.00159                         | 0.05953                       | 0.03159                               | 0.00067      |                                 |                               |
| 3.49614                        | 0.04332                       | 4.01753                                 | 0.09050      | 0.00097                         | 0.10259                       | 0.07764                               | 0.00057      |                                 |                               |
| 3.98745                        | 0.08222                       | 4.03888                                 | 0.10347      | 0.00199                         | 0.10467                       | 0.08018                               | 0.00081      |                                 |                               |
| 0.83549                        | 0.01604                       | 0.83181                                 | 0.06134      | 0.00112                         | 0.06109                       | 0.03051                               | 0.00027      |                                 |                               |
| 0.81008                        | 0.01508                       | 0.84031                                 | 0.05681      | 0.00100                         | 0.05879                       | 0.03135                               | 0.00033      |                                 |                               |

Table DR1. U/Pb data (2 of 3)

| <b>208Pb corr'd<br/>207Pb*/206Pb*</b> |             | <b>208Pb<br/>corr'd<br/>206Pb*/238U</b> |             | <b>Comment</b> |
|---------------------------------------|-------------|-----------------------------------------|-------------|----------------|
| <b>age (Ma)</b>                       | <b>± 1σ</b> | <b>age (Ma)</b>                         | <b>± 1σ</b> |                |
| 2722.5                                | 70.9        | 2623.2                                  | 101.4       |                |
| 612.7                                 | 20.4        | 555.6                                   | 21.5        | Discordant     |
| 378.1                                 | 10.7        | 398.7                                   | 15.4        |                |
| 2662.5                                | 68.9        | 2677.9                                  | 103.5       |                |
| 2688.1                                | 69.5        | 2681.2                                  | 103.7       |                |
| 1162.2                                | 30.3        | 1133.9                                  | 43.7        |                |
| 1180.2                                | 33.4        | 1180.6                                  | 45.7        |                |
| 1326.3                                | 35.1        | 1307.9                                  | 50.5        |                |
| 2650.1                                | 71.0        | 2459.5                                  | 95.4        | Discordant     |
| 1068.8                                | 29.4        | 1088.1                                  | 42.1        |                |
| 1008.0                                | 26.5        | 972.1                                   | 37.5        |                |
| 703.5                                 | 26.2        | 623.8                                   | 24.4        | Discordant     |
| 1054.2                                | 34.2        | 1068.7                                  | 41.5        |                |
| 760.2                                 | 21.6        | 766.6                                   | 29.7        |                |
| 984.4                                 | 31.7        | 1013.8                                  | 39.4        |                |
| 513.2                                 | 16.4        | 540.3                                   | 20.9        |                |
| 1564.8                                | 41.0        | 1512.2                                  | 58.4        |                |
| 137.4                                 | 27.7        | 374.6                                   | 20.7        | Discordant     |
| 1191.5                                | 32.3        | 1182.7                                  | 49.6        |                |
| 1491.8                                | 43.0        | 1490.4                                  | 57.6        |                |
| 1035.7                                | 35.0        | 1055.7                                  | 41.5        |                |
| 992.3                                 | 28.5        | 961.9                                   | 37.4        |                |
| 601.7                                 | 19.0        | 607.5                                   | 23.6        |                |
| 1206.9                                | 33.0        | 1098.6                                  | 42.6        | Discordant     |
| 2740.4                                | 72.4        | 2698.8                                  | 104.1       |                |
| 1477.5                                | 38.7        | 1468.0                                  | 56.6        |                |
| 300.3                                 | 13.3        | 381.9                                   | 15.0        | Discordant     |
| 435.5                                 | 19.6        | 448.6                                   | 17.5        |                |
| 1039.8                                | 29.1        | 1025.8                                  | 39.7        |                |
| 1194.4                                | 35.3        | 1231.3                                  | 47.6        |                |
| 1491.6                                | 39.8        | 1400.5                                  | 54.2        |                |
| 1195.2                                | 33.2        | 1181.6                                  | 45.8        |                |
| 1343.3                                | 43.5        | 1432.5                                  | 56.6        |                |
| 1121.9                                | 30.4        | 1138.4                                  | 44.0        |                |
| 1727.5                                | 46.3        | 1610.7                                  | 62.3        | Discordant     |
| 586.6                                 | 22.4        | 581.9                                   | 22.8        |                |
| 1671.4                                | 129.7       | 1614.0                                  | 67.3        |                |
| 1708.4                                | 47.7        | 1591.3                                  | 62.0        | Discordant     |
| 642.4                                 | 20.2        | 607.6                                   | 23.6        |                |
| 559.5                                 | 18.1        | 636.4                                   | 24.7        | Discordant     |

Table DR1.U/Pb data (2 of 3)

| Sample   | U (ng) | Th (ng) | Th/U | He (nmol) | Radius (σm) | Ft    | Measured age (Ma) | Corrected age (Ma) | 2σ error (Ma) |
|----------|--------|---------|------|-----------|-------------|-------|-------------------|--------------------|---------------|
| 0203151A | 1.73   | 0.606   | 0.35 | 292       | 38          | 0.753 | 178               | 223                | 18            |
| 0203151B | 0.362  | 0.308   | 0.85 | 171       | 40          | 0.744 | 355               | 401                | 32            |
| 0203151C | 4.01   | 1.31    | 0.33 | 537       | 46          | 0.786 | 207               | 246                | 20            |
| 0203151D | 1.32   | 0.531   | 0.40 | 208       | 54          | 0.804 | 273               | 309                | 25            |
| 0203152A | 0.147  | 0.109   | 0.75 | 116       | 35          | 0.713 | 400               | 452                | 36            |
| 0203152B | 0.349  | 0.432   | 1.2  | 141       | 42          | 0.749 | 294               | 339                | 27            |
| 0203152C | 0.743  | 0.397   | 0.53 | 304       | 37          | 0.732 | 283               | 331                | 27            |
| NAV1-1   | 0.996  | 0.896   | 0.90 | 389       | 80          | 0.852 | 1286              | 1314               | 105           |
| NAV1-4   | 1.90   | 0.404   | 0.21 | 510       | 77          | 0.854 | 1066              | 1093               | 87            |
| NAV1-5   | 0.889  | 0.794   | 0.89 | 968       | 48          | 0.785 | 1296              | 1337               | 107           |
| NAV1-6   | 2.07   | 0.419   | 0.20 | 311       | 63          | 0.819 | 319               | 354                | 28            |
| NAV1-7   | 0.592  | 0.232   | 0.39 | 231       | 40          | 0.752 | 342               | 390                | 31            |
| NAV1-8   | 0.776  | 0.244   | 0.31 | 213       | 54          | 0.805 | 473               | 511                | 41            |
| NAV1-10  | 1.33   | 0.470   | 0.35 | 241       | 49          | 0.781 | 214               | 256                | 20            |
| NAV1-20  | 0.675  | 0.530   | 0.79 | 512       | 48          | 0.777 | 799               | 842                | 67            |
| NAV2-1   | 0.278  | 0.160   | 0.57 | 40.5      | 55          | 0.808 | 265               | 301                | 24            |
| NAV2-2   | 0.583  | 0.154   | 0.26 | 120       | 60          | 0.811 | 374               | 410                | 33            |
| NAV2-3   | 0.326  | 0.237   | 0.73 | 130       | 43          | 0.754 | 319               | 366                | 29            |
| NAV2-5   | 0.365  | 0.722   | 2.0  | 340       | 51          | 0.790 | 1047              | 1087               | 87            |
| NAV2-6   | 1.80   | 0.432   | 0.24 | 442       | 52          | 0.793 | 353               | 392                | 31            |
| NAV2-8   | 0.855  | 1.09    | 1.3  | 142       | 51          | 0.784 | 184               | 225                | 18            |
| NAV2-9   | 0.863  | 0.324   | 0.38 | 166       | 51          | 0.787 | 307               | 348                | 28            |
| NAV2-16  | 0.618  | 0.285   | 0.46 | 92.2      | 53          | 0.806 | 284               | 320                | 26            |
| NAV2-19  | 1.60   | 0.276   | 0.17 | 290       | 62          | 0.827 | 463               | 496                | 40            |

Table DR2. (U-TH)/He data
